# Supplementary material for: Use of Dietary Fibers in Reducing the Risk of Several Cancer Types: An Umbrella Review
Source: MDPI journal article supplement (doi:10.3390/nu15112545), 2023-05-30
Supplement: s1 [file s1]

**Table S1:** Literature screening details and exclusion reasons

| First author | Year of publication | Regional distribution (number of studies) | Number of included studies |                |     |                |                       |       | Sample size | Types of dietary fiber            | Outcome           | Inclusion | Reasons for exclusion                     |
|--------------|---------------------|-------------------------------------------|----------------------------|----------------|-----|----------------|-----------------------|-------|-------------|-----------------------------------|-------------------|-----------|-------------------------------------------|
|              |                     |                                           | Case-control studies       | Cohort studies | RCT | clinical trial | Observational studies | total |             |                                   |                   |           |                                           |
| Kun Chen     | 2002                | China (14)                                | 14                         | 0              | 0   | 0              | 0                     | 14    | 10,239      | TDF                               | Colorectal cancer | No        | Same studies as Vincenza Gianfredi et al. |
| Weishuai Liu | 2016                | Asia (2), Europe (4), United States (4)   | 5                          | 5              | 0   | 0              | 0                     | 10    | 254,213     | TDF, SDF, IDF, CDF, FDF, VDF      | prostate cancer   | Yes       |                                           |
| Zuwang Liu   | 2015                | China (1), Europe (4), United States (11) | 0                          | 16             | 0   | 0              | 0                     | 16    | 475,937     | TDF                               | breast cancer     | No        | Same studies as Maryam S. Farvid et al.   |
| Hongmei Shao | 2014                | China (25)                                | 25                         | 0              | 0   | 0              | 0                     | 25    | 16,603      | Coarse grains, vegetables, fruits | Colon cancer      | No        | no effect size                            |
| Ming Xu      | 2015                |                                           |                            |                |     |                |                       |       |             |                                   |                   | No        | narrative review                          |
| Dang Zhang   | 2017                | NA                                        | 15                         | 0              | 0   | 0              | 0                     | 15    | 1,092,863   | TDF                               | breast cancer     | No        | Same studies as Maryam S. Farvid et al.   |
| Wei Zhang    | 2015                |                                           |                            |                |     |                |                       |       |             |                                   |                   | No        | narrative review                          |

|                                 |      |                                             |    |    |   |   |   |    |           |                                       |                    |    |                                           |
|---------------------------------|------|---------------------------------------------|----|----|---|---|---|----|-----------|---------------------------------------|--------------------|----|-------------------------------------------|
| Qian Zhou                       | 2019 | China (9) , Europe (2)                      | 11 | 0  | 0 | 0 | 0 | 11 | 10,890    | Low dietary fiber intake              | Colon cancer       | No | Same studies as Daniele Nucci et al.      |
| Mehmet Emin Arayici             | 2022 | Asia (5) , United States (3) , Europe (3)   | 7  | 5  | 0 | 0 | 0 | 12 | 433,162   | TDF, SDF, IDF                         | Colorectal cancer  | No | Same studies as Vincenza Gianfredi et al. |
| Tracey K. Asano                 | 2002 | United States (2) , Europe (3)              | 0  | 0  | 5 | 0 | 0 | 5  | 4,349     | Integrated meals                      | Colorectal adenoma | No | Same studies as Daniele Nucci et al.      |
| D. Aune                         | 2012 | United States (9) , Europe (6) , Asia (1)   | 0  | 16 | 0 | 0 | 0 | 16 | NA        | TDF, FDF, VDF, CDF, SDF, IDF          | breast cancer      | No | Same studies as Maryam S. Farvid et al.   |
| Dagfinn Aune research associate | 2011 | United States (12) , Europe (5) , Asia (4)  | 0  | 21 | 0 | 0 | 0 | 21 | 1,985,552 | TDF, FDF, VDF, LDF, CDF, Whole grains | Colon cancer       | No | Same studies as Vincenza Gianfredi et al. |
| Dagfinn Aune                    | 2016 | Europe (20) , United States (16) , Asia (9) | 0  | 45 | 0 | 0 | 0 | 45 | 640,065   | Whole grain fiber                     | Total cancer       | No | beside the topic                          |
| Elisa V Bandera                 | 2007 | China (2) , North America (8)               | 9  | 1  | 0 | 0 | 0 | 10 | 13,069    | TDF                                   | Endometrial cancer | No | Same studies as Hengjie Li et al.         |

|                       |      |                                             |    |    |   |   |     |     |           |                         |                                                                   |    |                                         |
|-----------------------|------|---------------------------------------------|----|----|---|---|-----|-----|-----------|-------------------------|-------------------------------------------------------------------|----|-----------------------------------------|
| Nerea Becerra-Tomás   | 2021 | NA                                          | 0  | 0  | 4 | 0 | 104 | 108 | >15,100   | TDF                     | All-cause mortality                                               | No | beside the topic                        |
| Qiwen Ben             | 2014 | United States (12) , Europe (6) , Asia (2)  | 16 | 4  | 0 | 0 | 0   | 20  | 10,948    | TDF, FDF, VDF, CDF      | Colorectal adenoma                                                | No | Same studies as Daniele Nucci et al.    |
| Sanaz Benisi-Kohansal | 2016 | United States (11) , Europe (8) China (1)   | 0  | 20 | 0 | 0 | 0   | 20  | 2,282,603 | Whole grain fiber       | Total cancer mortality, stomach cancer, lung cancer, colon cancer | No | beside the topic                        |
| Guo-Chong Chen        | 2016 | United States (6) , Europe (7) , Asia (1)   | 0  | 14 | 0 | 0 | 0   | 14  | NA        | Whole grain fiber       | All-cause mortality                                               | No | beside the topic                        |
| Kangning Chen         | 2018 | North America (11) , Europe (2) , China (2) | 12 | 3  | 0 | 0 | 0   | 15  | 110,374   | TDF, CDF, VDF, FDF, IDF | Endometrial cancer                                                | No | Same studies as Hengjie Li et al.       |
| Sumei Chen            | 2016 | North America (10) , Europe (12) , Asia (2) | 0  | 0  | 0 | 0 | 0   | 24  | 3,662,421 | TDF                     | breast cancer                                                     | No | Same studies as Maryam S. Farvid et al. |
| Helen G Coleman       | 2013 | United States (6) , Europe                  | 10 | 0  | 0 | 0 | 0   | 10  | 10,436    | TDF                     | Adenocarcinoma of the esoph                                       | No | Same studies as Lingli Sun et al.       |

|                    |      |                                                            |    |    |   |   |   |    |           |                            |                                                |     |                                           |
|--------------------|------|------------------------------------------------------------|----|----|---|---|---|----|-----------|----------------------------|------------------------------------------------|-----|-------------------------------------------|
|                    |      | (3) , Asia (1)                                             |    |    |   |   |   |    |           |                            | agus, squamous cell carcinoma of the esophagus |     |                                           |
| Christina C. Dahm  | 2010 | United Kingdom (7)                                         | 0  | 7  | 0 | 0 | 0 | 7  | 2,575     | Dietary fiber density, TDF | colorectal cancer                              | No  | Same studies as Vincenza Gianfredi et al. |
| Jia-Yi Dong        | 2011 | North America (5) , Europe (4) , China (1)                 | 0  | 10 | 0 | 0 | 0 | 10 | 712,195   | TDF                        | breast cancer                                  | No  | Same studies as Maryam S. Farvid et al.   |
| Maryam S. Farvid   | 2020 | North America (10) , Europe (8) , Australia (1) , Asia (2) | 2  | 17 | 0 | 2 | 0 | 21 | 2,092,037 | TDF, CDF, FDF, VDF, LDF    | breast cancer                                  | Yes |                                           |
| Glenn A. Gaesser   | 2020 | NA                                                         |    |    |   |   |   |    |           |                            |                                                | No  | beside the topic                          |
| Vincenza Gianfredi | 2019 | Europe (8) , United States (4) , Asia (6)                  | 6  | 12 | 0 | 0 | 0 | 18 | 2,176,814 | TDF                        | Rectal cancer                                  | Yes |                                           |
| Vincenza Gianfredi | 2018 | Europe (8) , North America (6) , Asia (7)                  | 14 | 7  | 0 | 0 | 0 | 21 | 3,742,355 | TDF                        | Colon cancer                                   | Yes |                                           |

|                     |      |                                                            |    |    |   |   |   |    |           |                         |                         |     |                                         |
|---------------------|------|------------------------------------------------------------|----|----|---|---|---|----|-----------|-------------------------|-------------------------|-----|-----------------------------------------|
| P. HAAS             | 2009 | NA                                                         | 0  | 11 | 0 | 0 | 0 | 11 | 1,511,171 | TDF                     | colorectal cancer       | No  | no effect size                          |
| Maryam Hajishafiee  | 2016 | United States (10) , Europe (5) , Australia (2) , Asia (1) | 0  | 18 | 0 | 0 | 0 | 18 | 1,740,040 | CDF                     | Total cancer mortality  | No  | beside the topic                        |
| Tung Hoang          | 2020 |                                                            |    |    |   |   |   |    |           |                         |                         | No  | dietary pattern and lifestyle           |
| Tian-bao Huang      | 2014 | North America (4) , Europe (3)                             | 5  | 2  | 0 | 0 | 0 | 7  | 941,202   | TDF, CDF, FDF, VDF, LDF | Renal cell carcinoma    | Yes |                                         |
| Xiumin Huang        | 2018 | United States (10) , Europe (4) , Asia (3)                 | 13 | 4  | 0 | 0 | 0 | 17 | 149,117   | TDF                     | Risk of ovarian cancer  | No  | Same studies as Hui Xu et al.           |
| Masoumeh Jabbari    | 2022 |                                                            |    |    |   |   |   |    |           |                         |                         | No  | review without meta-analysis            |
| Elizabeth T Jacobs  | 2006 |                                                            |    |    |   |   |   |    |           |                         |                         | No  | review without meta-analysis            |
| Ahmad Jayedi        | 2020 | North America (5) , Europe (1) , Australia (1)             | 0  | 7  | 0 | 0 | 0 | 7  | 11,295    | TDF                     | breast cancer mortality | No  | Same studies as Maryam S. Farvid et al. |
| Alireza Khandavandi | 2020 |                                                            |    |    |   |   |   |    |           |                         |                         | No  | dietary pattern and lifestyle           |

|              |      |                                                                |    |    |   |   |   |    |           |     |                                       |     |                                      |
|--------------|------|----------------------------------------------------------------|----|----|---|---|---|----|-----------|-----|---------------------------------------|-----|--------------------------------------|
| Youngyo Kim  | 2015 | Europe (7) , United States (5) , Australia (2) , Asia (1)      | 0  | 15 | 0 | 0 | 0 | 15 | 1,409,014 | TDF | Total cancer mortality                | Yes |                                      |
| Ai Seon Kuan | 2019 |                                                                |    |    |   |   |   |    |           |     |                                       | No  | review without meta-analysis         |
| Qiucheng Lei | 2016 | Europe (3) , United States (5)                                 | 7  | 1  | 0 | 0 | 0 | 8  | 43,629    | TDF | pancreatic cancer                     | No  | Same studies as Daniele Nucci et al. |
| Hengjie Li   | 2019 | United States (10) Europe (4) , Asia (2)                       | 13 | 3  | 0 | 0 | 0 | 16 | 198,174   | TDF | Endometrial cancer                    | Yes |                                      |
| Ning Li      | 2022 | Asia (3) , Australia (3) , Europe (2) , North America (2) , 3) | 0  | 51 | 0 | 0 | 0 | 51 | 2,725,657 | TDF | Breast cancer incidence and mortality | No  | beside the topic                     |
| Lihua Liu    | 2014 | United States (13) , Europe (10) , Asia (1) , NA (1)           | 0  | 25 | 0 | 0 | 0 | 25 | 1,752,848 | TDF | Total cancer mortality                | No  | Same studies as Youngyo Kim et al.   |

|               |      |                                                                              |    |    |   |   |   |    |           |     |                                            |     |                                           |
|---------------|------|------------------------------------------------------------------------------|----|----|---|---|---|----|-----------|-----|--------------------------------------------|-----|-------------------------------------------|
| Yu Ma, MD     | 2018 | United States (7) , Europe (4)                                               | 0  | 11 | 0 | 0 | 0 | 11 | 1,450,553 | TDF | Proximal colon cancer, distal colon cancer | No  | Same studies as Vincenzo Gianfredi et al. |
| Qi-qi Mao     | 2017 | North America (6) , Europe (5) , Asia (2) , Australia (1)                    | 13 | 1  | 0 | 0 | 0 | 14 | 38,141    | TDF | pancreatic cancer                          | No  | Same studies as Daniele Nucci et al.      |
| Masrul Masrul | 2019 | Asia (10)                                                                    | 8  | 2  | 0 | 0 | 0 | 10 | 49,964    | TDF | Colon cancer                               | No  | Same studies as Vincenzo Gianfredi et al. |
| Marc P. McRae | 2018 |                                                                              |    |    |   |   |   |    |           |     |                                            | No  | review without meta-analysis              |
| Daniele Nucci | 2021 | United States (18) Europe (2) , Asia (1)                                     | 12 | 8  | 0 | 0 | 1 | 21 | 157,725   | TDF | Colorectal adenoma                         | Yes |                                           |
| Daniele Nucci | 2021 | Europe (7) , North America (7) , Asia (2) , Australia (1) , Multi-center (1) | 15 | 3  | 0 | 0 | 0 | 18 | 343,120   | TDF | pancreatic cancer                          | Yes |                                           |

|                     |      |                                                         |    |    |    |   |   |    |           |                                   |                                  |    |                                           |
|---------------------|------|---------------------------------------------------------|----|----|----|---|---|----|-----------|-----------------------------------|----------------------------------|----|-------------------------------------------|
| Hannah Oh           | 2019 | United States (9) , Europe (1)                          | 0  | 10 | 0  | 0 | 0 | 10 | 1,340,841 | Whole grain fiber , FDF, VDF, LDF | Colorectal cancer                | No | Same studies as Vincenza Gianfredi et al. |
| Sin-Hye Park        | 2021 | North America (20) Europe (10) Asia (4) , Australia (1) |    |    |    |   |   |    | 120,167   |                                   |                                  | No | dietary pattern and lifestyle             |
| Yikyung Park        | 2005 |                                                         |    |    |    |   |   |    |           |                                   |                                  | No | review without meta-analysis              |
| Mingyue Rao         | 2020 | Europe (15) United States (1) , Australia (4)           | 0  | 1  | 17 | 2 | 0 | 20 | NA        | Indigestible carbohydrates        | Colorectal cancer                | No | beside the topic                          |
| Andrew Reynolds     | 2019 | NA                                                      |    |    |    |   |   | NA | 4,635     | TDF                               | Colorectal cancer, breast cancer | No | beside the topic                          |
| Lukas Schwingshackl | 2017 | North America (19) Europe (14) Asia (9) Australia (7)   | 0  | 0  | 49 | 0 | 0 | 49 | 287,304   | TDF                               |                                  | No | beside the topic                          |
| Tao Sheng           | 2015 | Europe (7) , North America (6) , South America          | 12 | 5  | 0  | 0 | 0 | 17 | 255,026   | TDF                               | prostate cancer                  | No | Same studies as Weishuai Liu et al.       |



|                   |      |                                            |    |   |   |   |   |    |         |                   |                      |     |                                           |
|-------------------|------|--------------------------------------------|----|---|---|---|---|----|---------|-------------------|----------------------|-----|-------------------------------------------|
|                   |      | (1) , South Africa<br>(1) , Asia (2)       |    |   |   |   |   |    |         |                   |                      |     |                                           |
| Lingli Sun        | 2015 | NA                                         | 15 | 0 | 0 | 0 | 0 | 15 | 16,885  | TDF               | Esophageal carcinoma | Yes |                                           |
| Reiko Suzuki      | 2009 |                                            |    |   |   |   |   |    |         |                   |                      | No  | review without meta-analysis              |
| Maria Tileri      | 2020 |                                            |    |   |   |   |   |    |         |                   |                      | No  | narrative review                          |
| Bruce Trock       | 1990 | NA                                         | 23 | 0 | 0 | 0 | 0 | 23 | NA      | TDF               | Colon cancer         | No  | Same studies as Vincenzo Gianfredi et al. |
| Sajesh K. Veettil | 2019 |                                            |    |   |   |   |   |    |         |                   |                      | No  | dietary pattern and lifestyle             |
| Nicola Veronese   | 2018 |                                            |    |   |   |   |   |    |         |                   |                      | No  | narrative review                          |
| Chun-Hui Wang     | 2015 | North America (6) , Europe (5) , other (3) | 13 | 1 | 0 | 0 | 0 | 14 | 38,111  | TDF               | pancreatic cancer    | No  | Same studies as Daniele Nucci et al.      |
| Shurui Wang       | 2021 |                                            |    |   |   |   |   |    |         |                   |                      | No  | beside the topic                          |
| Yunjun Xiao       | 2018 | Europe (7) , United States (2) , Asia (2)  | 7  | 4 | 0 | 0 | 0 | 11 | 131,151 | Whole grain fiber | breast cancer        | No  | beside the topic                          |

|                 |      |                                                            |    |    |   |   |   |    |           |                       |                                                      |     |                                         |
|-----------------|------|------------------------------------------------------------|----|----|---|---|---|----|-----------|-----------------------|------------------------------------------------------|-----|-----------------------------------------|
| Hui Xu          | 2018 | North America (12) Europe (4) , Asia (2) , Oceania (1)     | 14 | 5  | 0 | 0 | 0 | 19 | 567,742   | TDF                   | Risk of ovarian cancer                               | Yes |                                         |
| Kedi Xu         | 2022 | NA                                                         | 5  | 5  | 0 | 0 | 0 | 10 | NA        | TDF                   | breast cancer                                        | No  | Same studies as Maryam S. Farvid et al. |
| Yao Y           | 2017 | NA                                                         | 0  | 0  | 5 | 0 | 0 | 5  | 4,798     | Wheat bran fiber, TDF | Recurrence of colorectal adenoma                     | No  | beside the topic                        |
| Evan Y W Yu     | 2020 |                                                            |    |    |   |   |   |    |           |                       |                                                      | No  | review without meta-analysis            |
| B Zhang         | 2017 | United States (11) Europe (7) , Eastern Mediterranean (1)  | 0  | 19 | 0 | 0 | 0 | 19 | 1,041,692 | Whole grain fiber     | Total cancer mortality                               | No  | beside the topic                        |
| Xiao-Feng Zhang | 2020 | United States (15) Europe (15) Asia (4) , North Africa (1) | 20 | 15 | 0 | 0 | 0 | 35 | 2,663,278 | Whole grain fiber     | Colorectal cancer, stomach cancer, esophageal cancer | No  | beside the topic                        |
| Zhizhong Zhang  | 2013 | NA                                                         | 19 | 2  | 0 | 0 | 0 | 21 | 580,064   | TDF                   | gastric cancer                                       | Yes |                                         |
| Zhanwei Zhao    | 2021 |                                                            |    |    |   |   |   |    |           |                       |                                                      | No  | dietary pattern and lifestyle           |

|                 |      |                                                              |    |   |   |   |   |    |         |     |                    |    |                                       |
|-----------------|------|--------------------------------------------------------------|----|---|---|---|---|----|---------|-----|--------------------|----|---------------------------------------|
| Bowen Z<br>heng | 2018 | North Ame<br>rica (9) ,<br>Europe<br>(2) , Aus<br>tralia (2) | 10 | 3 | 0 | 0 | 0 | 13 | 142,189 | TDF | Ovarian c<br>ancer | No | Same studies a<br>s Hui Xu et a<br>l. |
| Jiali Zhe<br>ng | 2017 |                                                              |    |   |   |   |   |    |         |     |                    | No | dietary pattern<br>and lifestyle      |

**Table S2:** Methodological quality evaluation of literature

| Author                  | 1   | 2                                                        | 3           | 4           | 5   | 6   | 7           | 8           | 9           | 10  | 11  | 12  | 13  | 14  | 15  | 16  | Quality  |
|-------------------------|-----|----------------------------------------------------------|-------------|-------------|-----|-----|-------------|-------------|-------------|-----|-----|-----|-----|-----|-----|-----|----------|
| Liu WS et al [15]       | Yes | Yes                                                      | No          | Partial yes | Yes | Yes | No          | Partial yes | Partial yes | No  | Yes | Yes | Yes | Yes | Yes | Yes | Low      |
| Maryam S. Farvid [16]   | Yes | Yes                                                      | Yes         | Partial yes | No  | No  | No          | Yes         | Partial yes | No  | Yes | Yes | Yes | Yes | Yes | Yes | Low      |
| Vincenza Gianfredi [17] | Yes | Yes                                                      | No          | Partial yes | Yes | Yes | No          | Yes         | Partial yes | Low      |
| Vincenza Gianfredi [18] | Yes | Partial yes                                              | No          | Partial yes | Yes | Yes | No          | Yes         | Partial yes | No  | Yes | Yes | Yes | Yes | Yes | No  | Low      |
| Tian-bao Huang [19]     | Yes | No                                                       | No          | Partial yes | Yes | Yes | No          | Yes         | Partial yes | No  | Yes | Yes | Yes | Yes | Yes | Yes | Very low |
| Hengjie Li [20]         | Yes | Yes                                                      | No          | Partial yes | No  | No  | No          | Yes         | Partial yes | Low      |
| Daniele Nucci [21]      | Yes | Yes                                                      | No          | Partial yes | Yes | Yes | Partial yes | Partial yes | Partial yes | High     |
| Daniele Nucci [22]      | Yes | Yes                                                      | Partial yes | Partial yes | Yes | Yes | Partial yes | Partial yes | Partial yes | Yes | Yes | Yes | Yes | Yes | No  | Yes | Low      |
| Lingli Sun [23]         | Yes | No                                                       | No          | Partial yes | Yes | Yes | No          | Partial yes | Partial yes | No  | Yes | Yes | Yes | Yes | Yes | No  | Very low |
| Hui Xu [24]             | Yes | Yes                                                      | No          | Partial yes | Yes | Yes | No          | Partial yes | Partial yes | Low      |
| Zhizhong Zhang [25]     | Yes | No                                                       | No          | Partial yes | Yes | Yes | No          | Partial yes | Partial yes | Very low |
| Yes                     |     | : the study fully meets the requirements of this item.   |             |             |     |     |             |             |             |     |     |     |     |     |     |     |          |
| Partial yes             |     | : the study partial meets the requirements of this item. |             |             |     |     |             |             |             |     |     |     |     |     |     |     |          |
| No                      |     | : the study does not meet the requirements of this item. |             |             |     |     |             |             |             |     |     |     |     |     |     |     |          |

1. Did the research questions and inclusion criteria for the review include the components of PICO? 2. Did the report of the review contain an explicit statement that the review methods were established prior to the conduct of the review and did the report justify any significant deviations from the protocol? 3. Did the review authors explain their selection of the study designs for inclusion in the review? 4. Did the review authors use a comprehensive literature search strategy? 5. Did the review authors perform study selection in duplicate? 6. Did the review authors perform data extraction in duplicate? 7. Did the review authors provide a list of excluded studies and justify the exclusions? 8. Did the review authors describe the included studies in adequate detail? 9. Did the review authors use a satisfactory technique for assessing the risk of bias (RoB) in individual studies that were included in the review? 10. Did the review authors report on the sources of funding for the studies included in the review? 11. If meta-analysis was performed did the review authors use appropriate methods for statistical combination of results? 12. If meta-analysis was performed, did the review authors assess the potential impact of RoB in individual studies on the results of the meta-analysis or other evidence synthesis? 13. Did the review authors account for RoB in individual studies when interpreting/ discussing the results of the review? 14. Did the review authors provide a satisfactory explanation for, and discussion of, any heterogeneity observed in the results of the review? 15. If they performed quantitative synthesis did the review authors carry out an adequate investigation of publication bias (small study bias) and discuss its likely impact on the results of the review? 16. Did the review authors report any potential sources of conflict of interest, including any funding they received for conducting the review?

**Table S3:** Evaluation of evidence grade

| cancer              | Reference                | Number of studies | Number and type of study included | Number of cases/sample size | Assessed with                                       | Main result                                                                                                                                                                                 | heterogeneity                                                                                                                                        | Dose-response                                                                | Publication bias | Plausible confounding | Level of evidence |
|---------------------|--------------------------|-------------------|-----------------------------------|-----------------------------|-----------------------------------------------------|---------------------------------------------------------------------------------------------------------------------------------------------------------------------------------------------|------------------------------------------------------------------------------------------------------------------------------------------------------|------------------------------------------------------------------------------|------------------|-----------------------|-------------------|
| Prostatic neoplasms | Liu WS<br><br>[15]       | 10                | 5C,5CC                            | 1,2058/<br>254,213          | TDF,<br>IDF,<br>SDF,<br>FDF,<br>VDF,<br>GDF         | RR(TDF):<br>0.87(0.77-0.99);<br>RR(IDF):<br>0.65(0.45-0.88);<br>RR(SDF):<br>0.78(0.64-0.95);<br>RR(FDF):<br>0.98(0.85-1.12);<br>RR(VDF):<br>0.91(0.70-1.18);<br>RR(GDF):<br>1.03(0.95-1.12) | TDF:<br>$I^2=56.6\%$ ;<br>IDF:<br>$I^2=56.0\%$ ;<br>SDF:<br>$I^2=0.0\%$ ;<br>FDF:<br>$I^2=31.4\%$ ;<br>VDF:<br>$I^2=75.0\%$ ;<br>GDF:<br>$I^2=0.0\%$ | Per 1 g/day increment in total dietary fiber<br>RR:<br>0.996 (0.989 – 1.002) | $P=0.064$        |                       | Probable          |
| esophageal cancer   | Lingli Sun<br>[23]       | 15                | 15CC                              | 3,625/<br>16,885            | TDF                                                 | RR:<br>0.52 (0.43-0.64)                                                                                                                                                                     | $I^2=71.6\%$                                                                                                                                         | Per 10 g/day increment in total dietary fiber<br>RR: 0.69 (0.61 – 0.79)      | $P>0.05$         |                       | not conclusive    |
| breast cancer       | Maryam S. Farvid<br>[16] | 20                | 2CC,17C,1CT                       | 69,735/<br>2,092,037        | TDF,<br>IDF,<br>SDF,<br>FDF,<br>VDF,<br>GDF,<br>LDF | RR(TDF):<br>0.92(0.88-0.95);<br>RR(IDF):<br>0.93(0.86-1.00);<br>RR(SDF):<br>0.90(0.84-0.96);<br>RR(FDF):<br>0.93(0.89-0.96);<br>RR(VDF):                                                    | TDF:<br>$I^2=12.6\%$ ;<br>IDF:<br>$I^2=33.4\%$ ;<br>SDF:<br>$I^2=12.6\%$ ;<br>FDF:<br>$I^2=9.0\%$ ;<br>VDF:                                          |                                                                              | $P>0.05$         |                       | Probable          |

|                      |                         |    |             |                      |                                                     |                                                                                                                                                              |                                                                                                               |                                                                            |                                                                             |  |            |
|----------------------|-------------------------|----|-------------|----------------------|-----------------------------------------------------|--------------------------------------------------------------------------------------------------------------------------------------------------------------|---------------------------------------------------------------------------------------------------------------|----------------------------------------------------------------------------|-----------------------------------------------------------------------------|--|------------|
|                      |                         |    |             |                      |                                                     | 0.95(0.90-1.00);<br>RR(GDF):<br>0.97(0.93-1.01);<br>RR(LDF):<br>0.97(0.92-1.03)                                                                              | $I^2=39.6\%$ ;<br>GDF:<br>$I^2=29.6\%$ ;<br>LDF:<br>$I^2=0.0\%$                                               |                                                                            |                                                                             |  |            |
| colon cancer         | Vincenza Gianfredi [18] | 21 | 8CC,13C     | >1,000/<br>2,627,391 | TDF                                                 | RR:<br>0.74(0.67-0.82)                                                                                                                                       | $I^2=43.8\%$                                                                                                  |                                                                            | $P=0.177$                                                                   |  | Probable   |
| Rectal Cancer        | Vincenza Gianfredi [17] | 22 | 9CC,13C     | >1,000/<br>2,876,136 | TDF                                                 | RR:<br>0.77(0.66-0.89)                                                                                                                                       | $I^2=9.1\%$                                                                                                   |                                                                            | $P=0.816$                                                                   |  | Probable   |
| renal cell carcinoma | Tian-bao Huang [19]     | 7  | 4CC,3C      | 6,115/<br>941,202    | TDF,<br>IDF,<br>SDF,<br>FDF,<br>VDF,<br>GDF,<br>LDF | RR(TDF):<br>0.84(0.74- 0.96);<br>RR(FDF):<br>0.92(0.80-1.05);<br>RR(VDF):<br>0.70(0.49-1.00);<br>RR(GDF):<br>1.04(0.91-1.18);<br>RR(LDF):<br>0.80(0.69-0.93) | TDF:<br>$I^2=23.8\%$ ;<br>FDF:<br>$I^2=0.0\%$ ;<br>VDF:<br>$I^2=76.9\%$ ;<br>GDF:<br>$I^2=0.0\%$ ;<br>LDF: NA | Per 10 g/day increment in total dietary fiber<br>RR:<br>0.94 (0.80 – 1.11) | Egger's test and Begg's test<br>( $P = 0.728$ , $P = 0.707$ , respectively) |  | suggestive |
| endometrial cancer   | Hengjie Li [20]         | 16 | 13CC,3C     | 6,563/<br>198,174    | TDF                                                 | RR:<br>0.86(0.78-0.93)                                                                                                                                       | TDF:<br>$I^2=69.1\%$                                                                                          |                                                                            | $P>0.05$                                                                    |  | Probable   |
| Colorectal Adenoma   | Daniele Nucci [22]      | 21 | 12CC,8C,1CT | >1,000/<br>157,725   | TDF                                                 | RR:<br>0.74(0.67-0.82)                                                                                                                                       | TDF:<br>$I^2=62.7\%$                                                                                          |                                                                            | $P=0.838$                                                                   |  | Probable   |
| Pancreatic Cancer    | Daniele Nucci [21]      | 18 | 15CC,3C     | >1,000/<br>343,120   | TDF                                                 | RR:<br>0.63(0.53-0.76)                                                                                                                                       | TDF:<br>$I^2=68.2\%$                                                                                          |                                                                            | $P=0.006$                                                                   |  | Probable   |

|                |                     |    |         |               |     |                     |                 |                                                                        |           |  |            |
|----------------|---------------------|----|---------|---------------|-----|---------------------|-----------------|------------------------------------------------------------------------|-----------|--|------------|
| ovarian cancer | Hui Xu [24]         | 19 | 14CC,5C | 8,200/567,742 | TDF | RR: 0.70(0.57-0.87) | TDF: $P=83.5\%$ |                                                                        | $P=0.276$ |  | suggestive |
| Gastric Cancer | Zhizhong Zhang [25] | 21 | 19CC,2C | 6,950/580,064 | TDF | RR: 0.58(0.49-0.67) | TDF: $P=62.2\%$ | Per 10 g/day increment in total dietary fiber<br>RR: 0.56 (0.45 -0.71) | $P=0.931$ |  | Convincing |
